# Supplementary material
Source: HighWire-hosted journal article supplement (http://www.qdcxjkg.com/highwire/filestream/113606/field_highwire_adjunct_files/1/patient_info_-_tests_conducted_in_tb_clinics_-_bengali.pdf)
Supplement: patient_info_-_tests_conducted_in_tb_clinics_-_bengali.pdf [file patient_info_-_tests_conducted_in_tb_clinics_-_bengali.pdf]

## টি বি ক্লিনিকে যে সকল টেস্ট করা হয়

### বক্ষ এক্স-রে

আপনার ফুসফুসে টিবি আছে কিনা তা পরীক্ষা করার জন্য এটি করা হয়। আপনার চিকিৎসা কাজ করছে কিনা তা পরীক্ষা করার জন্য এটি পুনরাবৃত্তি করা হতে পারে।

### কফ/থুথু পরীক্ষা

আপনার ফুসফুসে টিবি আছে কিনা তা পরীক্ষা করার জন্য আপনার কফের নমুনা প্রদান করতে বলা হতে পারে। আপনার চিকিৎসা কাজ করছে কিনা তা পরীক্ষা করার জন্য এটি পুনরাবৃত্তি করা হতে পারে।

### রক্ত পরীক্ষা

রক্ত পরীক্ষায় আপনি রক্তস্ফুল্পতায় ভুগছেন কিনা বা আপনার শরীরে কোন সংক্রমণ আছে কিনা তা ধরা পড়ে। চিকিৎসা শুরুর পর এই পরীক্ষার পুনরাবৃত্তি সংক্রমণ দূর হচ্ছে কিনা তা আমাদের জানাতে পারে।

চিকিৎসার সময় এবং পূর্বে আপনার যকৃৎ এবং কিডনি কেমন কাজ করছে তা জানার জন্য অন্য সকল পরীক্ষা করা হয়। এই সকল পরীক্ষা গুরুত্বপূর্ণ কারণ কিছু কিছু ঔষধ আপনার যকৃৎ এবং কিডনির কার্যকরিতাকে আক্রান্ত করতে পারে।

## অন্যান্য সংক্রমণের জন্য পরীক্ষা

টি বি ক্লিনিকে অংশগ্রহণকারী সকলকেই আমরা এইচ আই ভি পরীক্ষা প্রস্তাব করে থাকি। এইচ আই ভি শরীরের প্রতিরোধ ক্ষমতাকে নষ্ট করতে পারে, সুতরাং টিবি খুব সহজেই আক্রমণ করতে পারে। এইচ আই ভি এর উন্নত চিকিৎসা আছে যা আপনার স্বাস্থ্যের উন্নতি ঘটাতে পারে।

## অন্যান্য সংক্রমণের জন্য পরীক্ষা

আমরা হেপাটাইটিস বি এবং সি এর সংক্রমণের জন্যও আপনাকে পরীক্ষা করতে পারি। এই সকল সংক্রমণ আপনার যকৃৎ কিভাবে কাজ করে তা পরিবর্তন এবং আপনার টি বি এর চিকিৎসাকে প্রভাবিত করতে পারে। যদি আপনার পরীক্ষা ইতিবাচক হয় তাহলে আপনাকে বিশেষজ্ঞ দলের কাছে পাঠানো হতে পারে।

## গোপনীয়তা

আপনার সকল পরীক্ষার ফলাফল গোপনীয়তার সহিত বিবেচনা করা হবে এবং কেবলমাত্র স্বাস্থ্যসেবা পেশাদার যারা সরাসরি আপনার সেবায় জড়িত থাকবেন তাদের কাছেই তথ্য প্রদান করা হবে।

## আরো তথ্য

**এইচ আই ভি**

NAHIP: [www.nahip.org.uk](http://www.nahip.org.uk)

Do It Right:

[www.doitright.uk.com](http://www.doitright.uk.com)

THT: [www.tht.org.uk](http://www.tht.org.uk)

**টিবি**

NKS TB:

[www.hpa.org.uk/tbknowledge](http://www.hpa.org.uk/tbknowledge)

TB Alert: [www.tbalert.org](http://www.tbalert.org)

**অন্যান্য প্রয়োজনীয় সাইট**

NHS choices: [www.nhs.uk](http://www.nhs.uk)

Health Protection Agency:

[www.hpa.org.uk](http://www.hpa.org.uk)
